# Supplementary material
Source: PubMed Central journal article supplement (PMC1316980)
Supplement: molcellb_25_24_11073__1.pdf [file molcellb_25_24_11073__1.pdf]

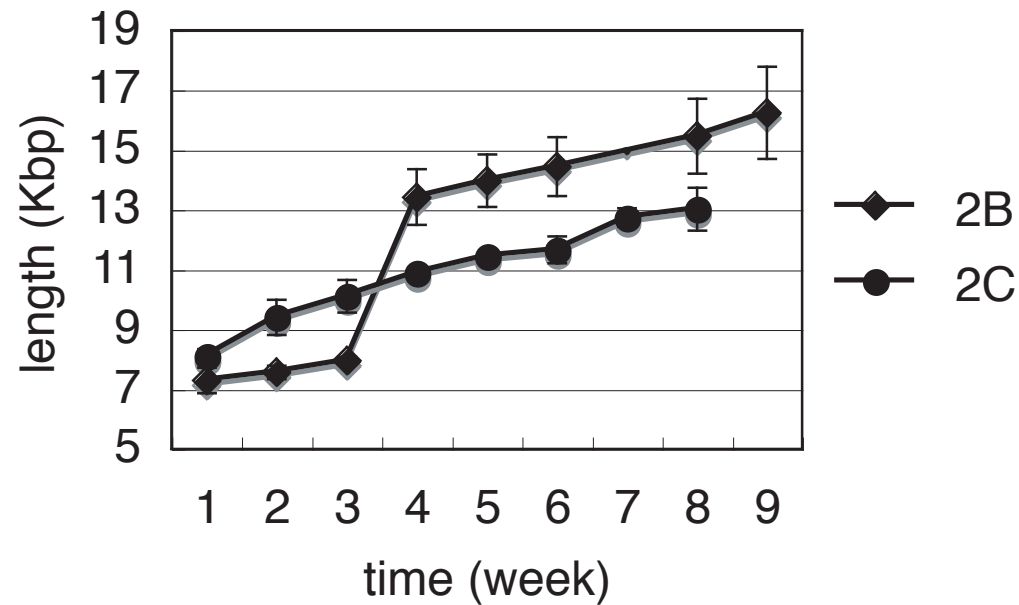

### Nakamura *et al.* Supplemental Fig. 1

Time course of telomere elongation in tsFT20 cells at 38°C

tsFT20 cells were cultured at 38°C, and telomere lengths were examined by Southern hybridization of DNA samples obtained at indicated intervals. The mode lengths of the hybridization signals were plotted. Two types of elongation time courses, corresponding to those shown in Figs. 2B and C, respectively, were reproducibly noted. One type (2B, Fig. 2B-type) is characterized by an abrupt increase in telomere length from week 4 to 5. The other type (2C, Fig. 2C-type) is characterized by a relatively constant increase in telomere length during the period of observation. In a total of eight independent cultures, the 2B-type and 2C-type elongations were observed five and three times, respectively. The figure shows the results quantitated from three experiments for each type.
